# Supplementary material for: Reproducible and replicable comparisons using SummarizedBenchmark
Source: Oxford University Press journal article supplement (doi:10.1093/bioinformatics/bty627), 2018-07-14
Supplement: bioinformatics_35_1_137_s0.pdf [file bioinformatics_35_1_137_s0.pdf]

# Supplementary Materials for “Reproducible and replicable comparisons using *SummarizedBenchmark*”

Patrick K. Kimes and Alejandro Reyes

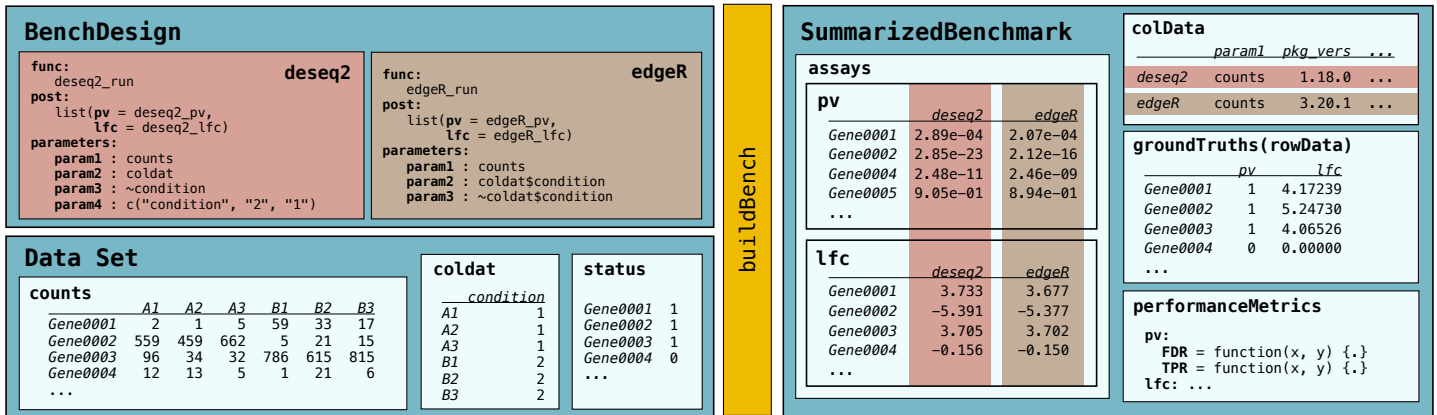

Supplementary Figure S1: *BenchDesign* and *SummarizedBenchmark* objects from the DE case study, along with the input data set for the benchmark comparison. Two methods, *DESeq2* and *edgeR*, are included in the *BenchDesign*. Two outputs are computed and stored in the *SummarizedBenchmark* for each method: p-values (*pv*) and log-fold change (*lfc*). The outputs and metadata for *DESeq2* and *edgeR* are highlighted in pink and brown for clarity.
